# Supplementary figures and images for: Molecular Basis of Mismatch Repair Protein Deficiency in Tumors from Lynch Suspected Cases with Negative Germline Test Results
Source: MDPI journal article supplement (doi:10.3390/cancers12071853), 2020-07-09

**A**

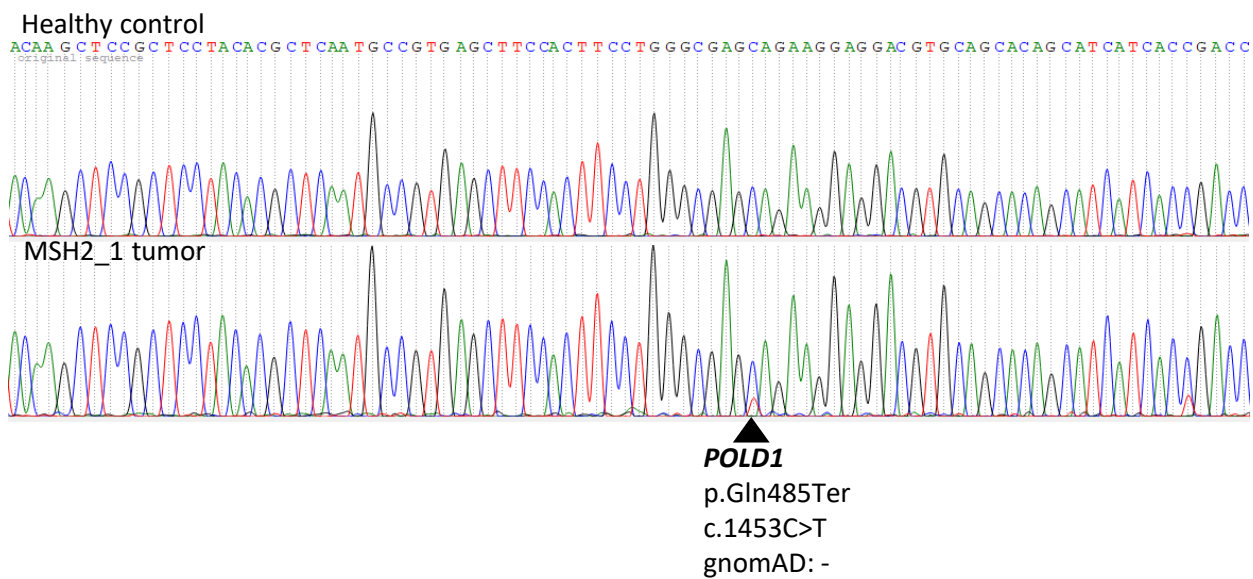

**B**

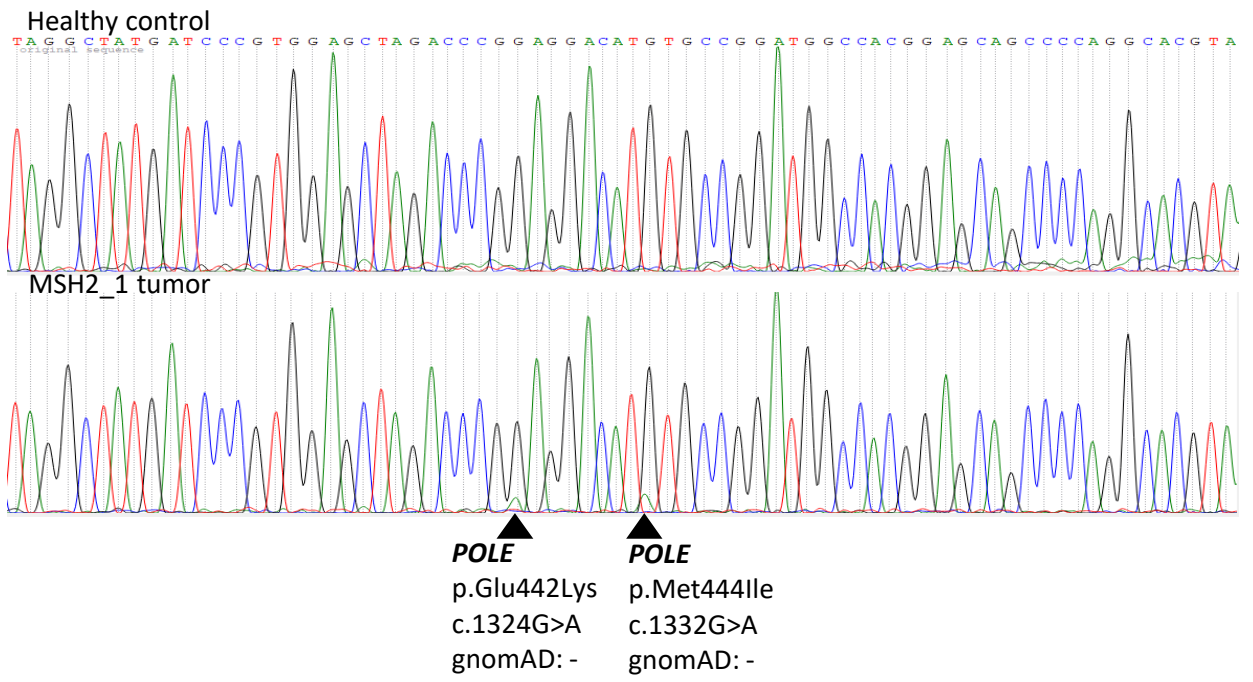

Supplement: s1 [file s1]
